# Supplementary material for: Photocatalytic reduction of CO2over Ag/TiO2nanocomposites prepared with a simple and rapid silver mirror method
Source: Royal Society of Chemistry journal article supplement (doi:10.1039/c6nr02547a), 2016-01-01
Supplement: c6nr02547a1.pdf [file c6nr02547a1.pdf]

## **Supporting Information**

### **Photoconversion of CO<sub>2</sub> over Ag/TiO<sub>2</sub> Nanocomposites Prepared with a Simple and Rapid Silver Mirror Method**

Bingcheng Yu,<sup>b,c</sup> Yong Zhou,<sup>\*,a,b,c</sup> Peng Li,<sup>c</sup> Wengguang Tu,<sup>b,c</sup> Ping Li,<sup>b,c</sup> Lanqin Tang,<sup>d</sup> Jinhua Ye,<sup>e,f</sup> and Zhigang Zou<sup>\*,b,c</sup>

<sup>a</sup> Key Laboratory of Modern Acoustics, MOE, Institute of Acoustics, School of Physics, Nanjing University, Nanjing 210093, P. R. China. E-mail: zhouyong1999@nju.edu.cn

<sup>b</sup> National Laboratory of Solid State Microstructures and Department of Physics, Nanjing University, Nanjing 210093, China. zgzou@nju.edu.cn

<sup>c</sup> Eco-materials and Renewable Energy Research Center (ERERC), Nanjing University, Nanjing 210093, P. R. China.

<sup>d</sup> College of Chemistry and Chemical Engineering, Yancheng Institute of Technology, Yancheng 22401, P. R. China

<sup>e</sup> Environmental of Remediation Materials Unit and Interantional Center for Materials Nanoarchitectures (WPI-MANA), 1-1 Namiki, Tsukuba, Ibaraki 305-004, Japan.

<sup>f</sup> TU-NIMS Joint Research Center, School of Material Science and Engineering, and Collaborative Innovation Center of Chemical Science and Engineering, Tianjin University, Tianjin 300072, P. R. China

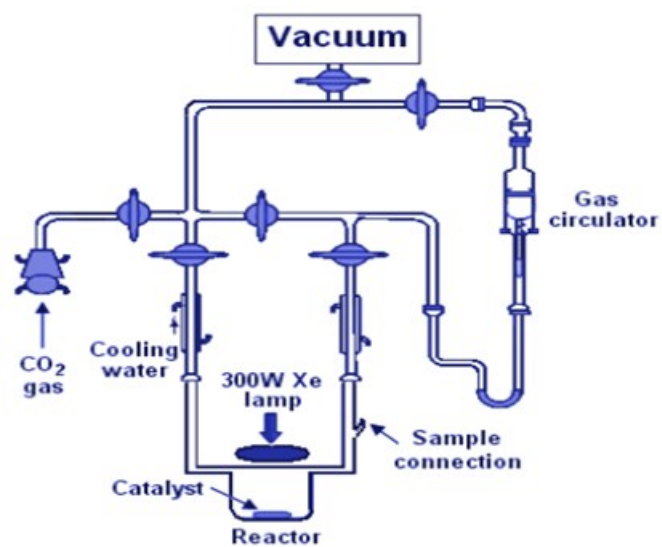

**Figure S1** Reaction setup for evaluation of conversion rate of CO<sub>2</sub>.

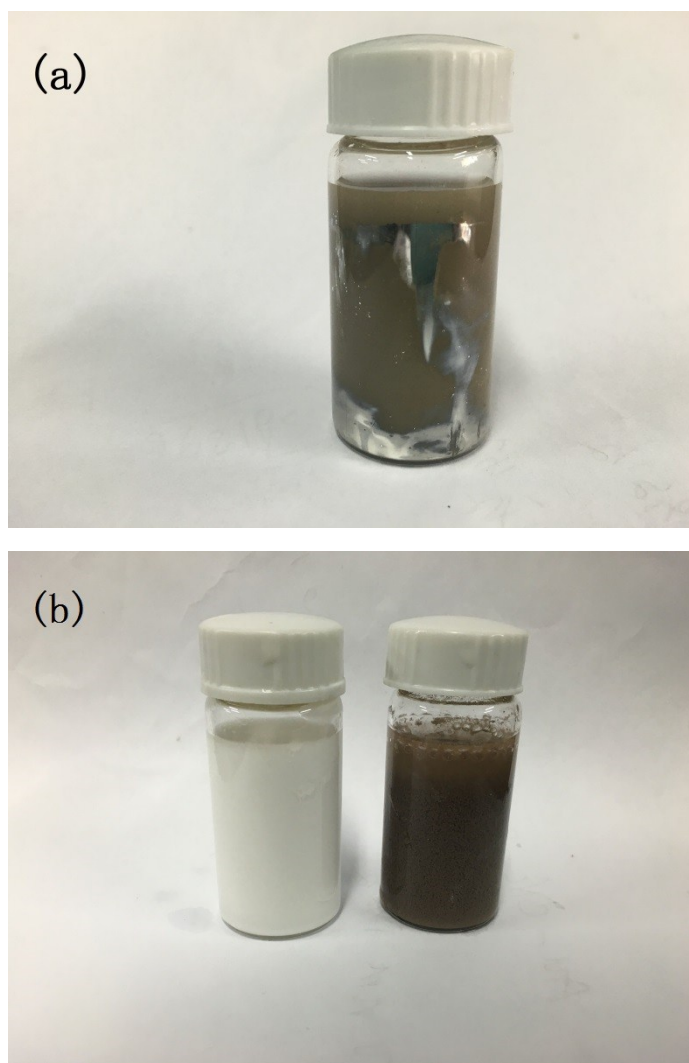

**Figure S2** (a) Glass bottle shows the solution after common silver mirror reaction in absence of  $\text{TiO}_2$  nanoparticles. (b) Left and right bottles show the solutions before and after silver mirror reaction in the presence of the  $\text{TiO}_2$  nanoparticles, respectively.

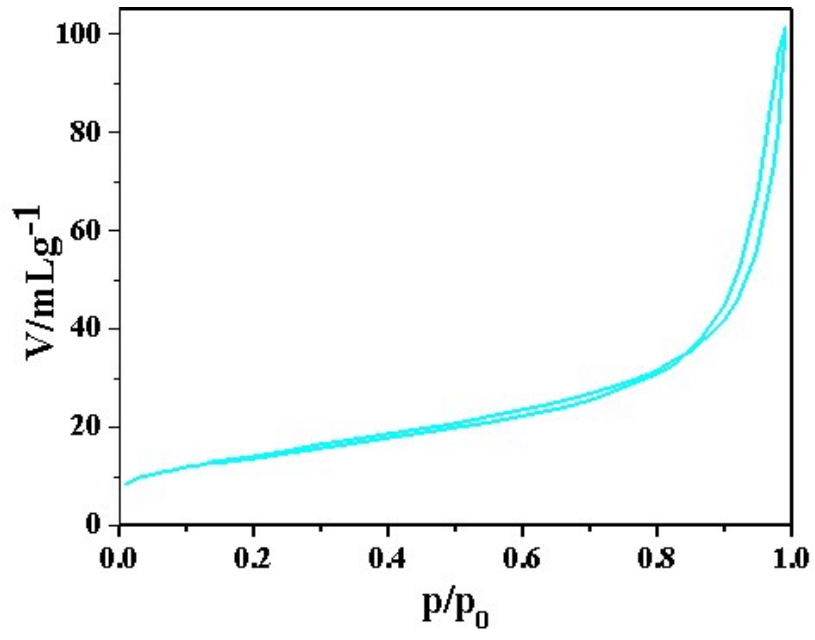

**Figure S3** N<sub>2</sub> adsorption-desorption isotherm of Ag-TiO<sub>2</sub>(1.5 wt%).

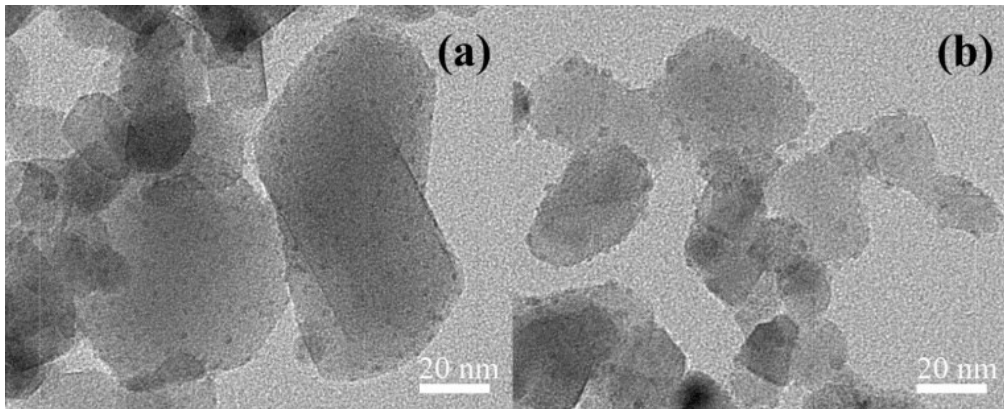

**Figure S4** TEM images of A/TiO<sub>2</sub> composite material with (a) 1.0 wt% and (b) 2.0 wt% Ag, respectively.

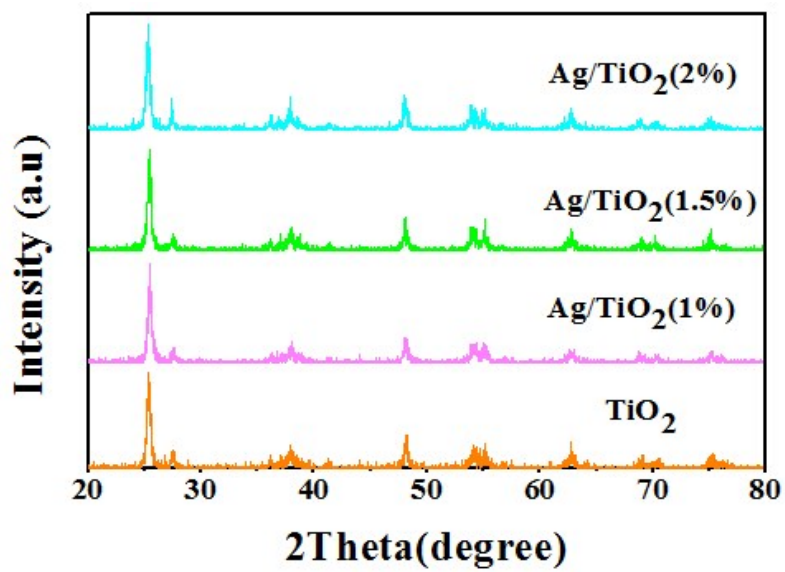

**Figure S5** XRD patterns of TiO<sub>2</sub>, 1 wt%, 1.5 wt%, and 2.0 wt% Ag/TiO<sub>2</sub>.

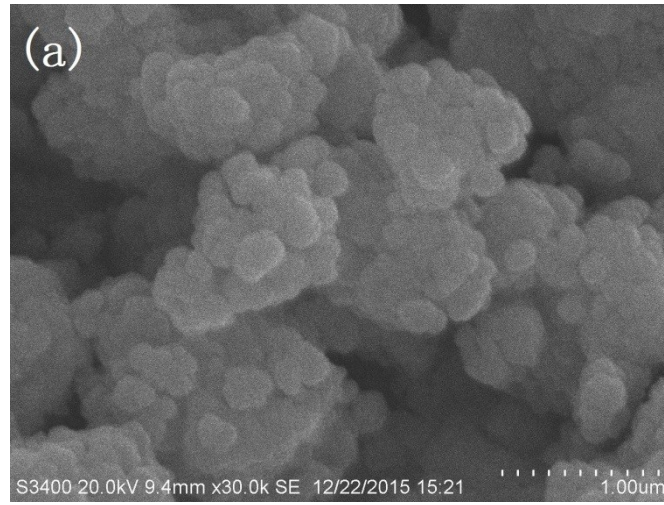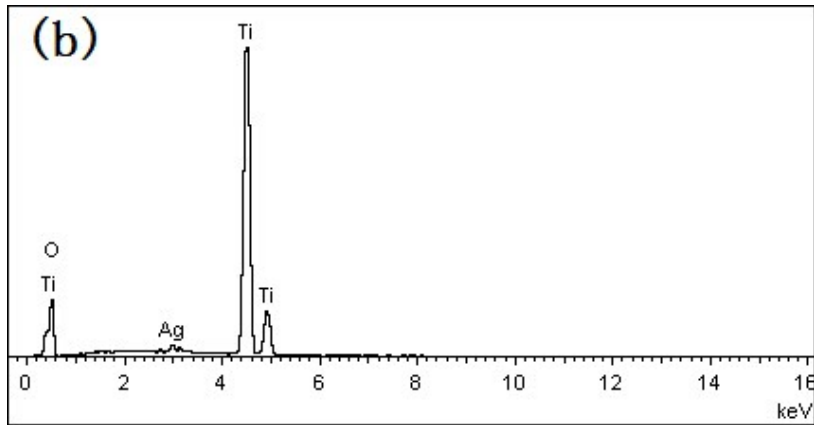

**Figure S6** (a) SEM image and (b) the corresponding EDS of 1.5 wt% Ag/TiO<sub>2</sub>.

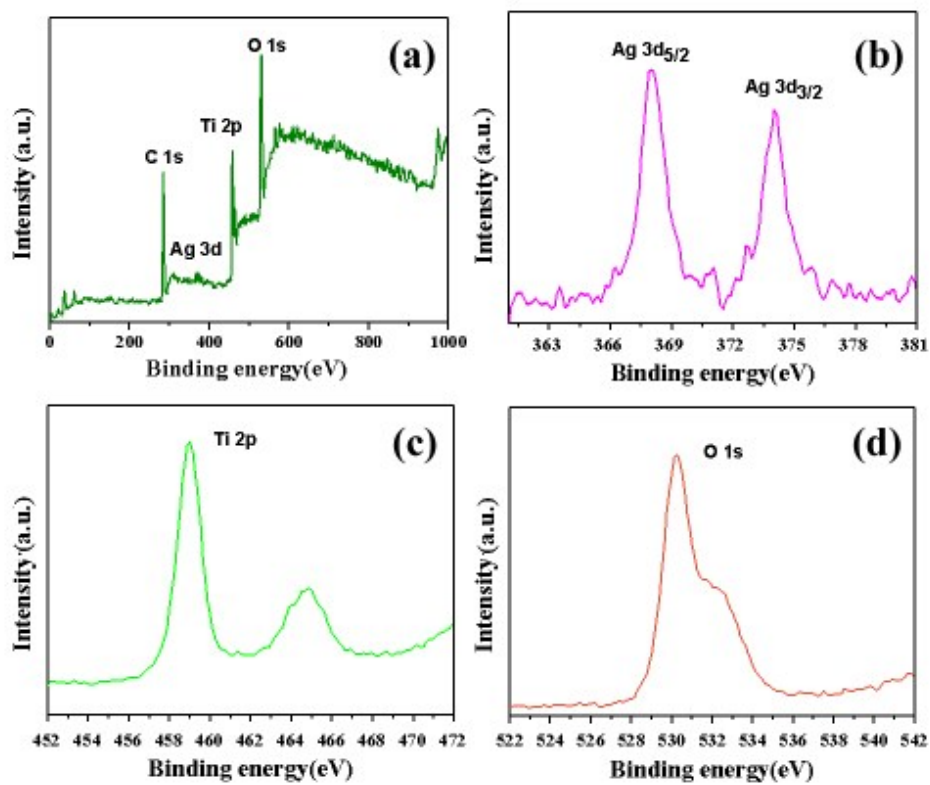

Figure S7 XPS spectra of Ag/TiO<sub>2</sub> composite with 1.5wt% Ag.



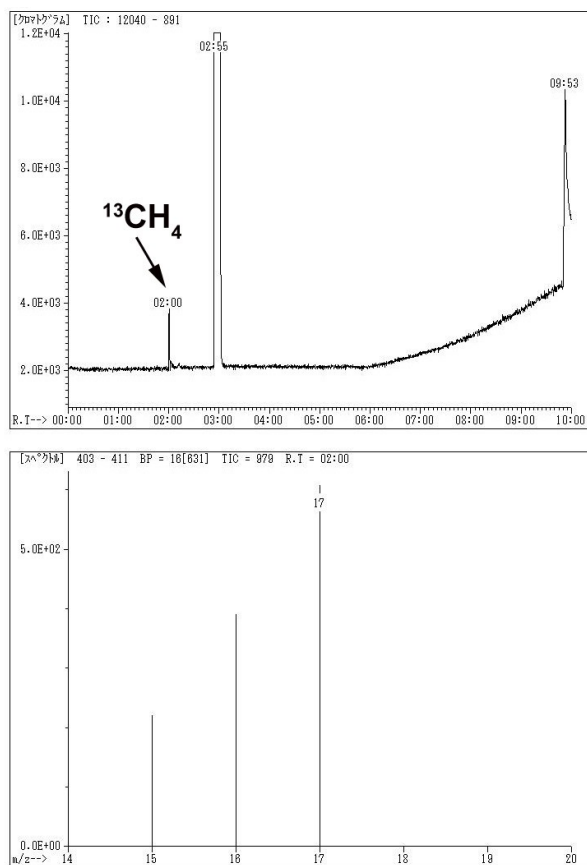

**Figure S8** Gas chromatogram (down) and mass spectrum of  $^{13}\text{CH}_4$  (top).

Carbon dioxide  $^{13}\text{CO}_2$  was used.

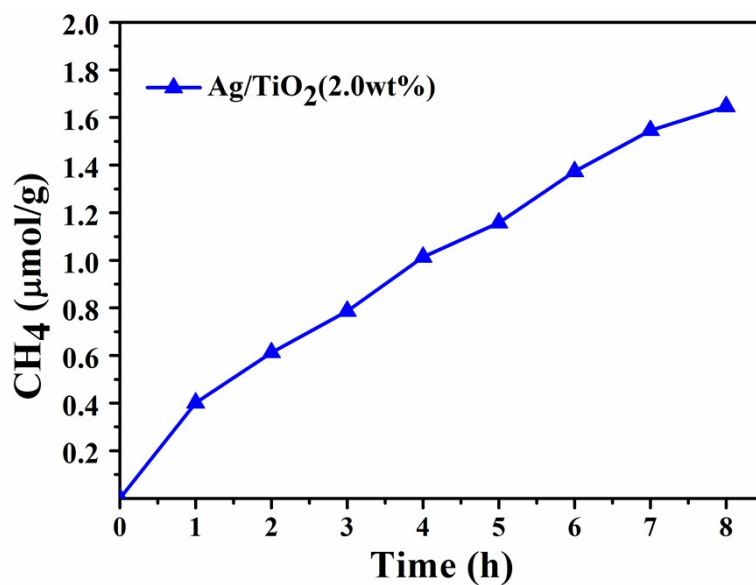

**Figure S9** CH<sub>4</sub> evolved during the photocatalytic using 2.0 wt% Ag/TiO<sub>2</sub> under visible light irradiation in gas phase photoreactions.

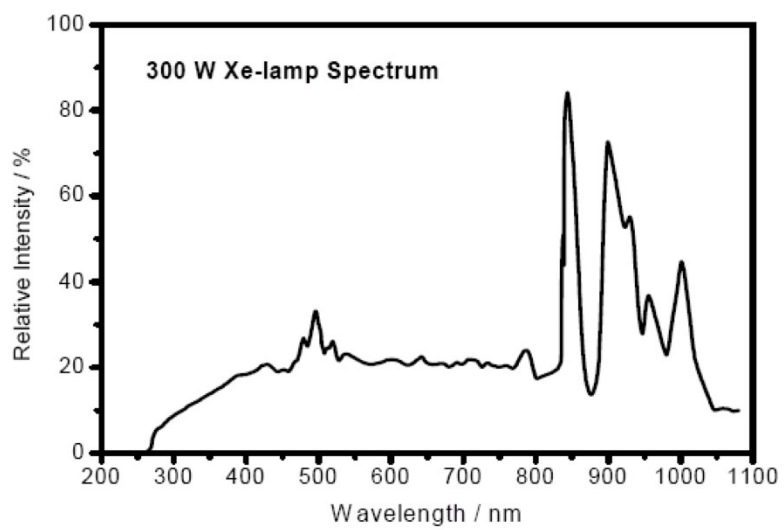

**Figure S10** Spectrum of 300W Xe-lamp.

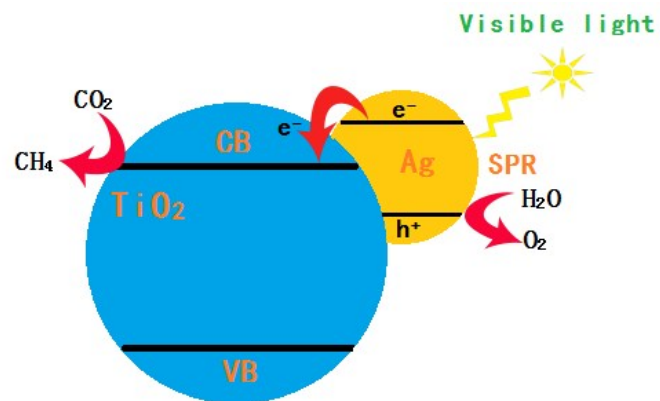

**Figure S11** Schematic representation of the SPR effect under visible irradiation in gas phase photoreaction.
